# Supplementary material for: Cancer Treatments: Past, Present, and Future
Source: Preprints.org preprint supplement (doi:10.20944/preprints202401.1989.v1), 2024-01-30
Supplement: Supplementary file 1 [file supplementary]

## Sheet: Suppl. Table 1
Gene Name (Alias)	Treatment type	Note: treatment type available as monotherapy or part of combination therapy in at least one indication.
ABL1	ABL1 inhibitors
AKT1	AKT inhibitors
ALK	ALK inhibitors
ATM	PARP inhibitors
ATR	PARP inhibitors
BARD1	PARP inhibitors
BRAF	BRAF, MEK inhibitors
BRCA1	PARP inhibitors
BRCA2	PARP inhibitors
BRIP1	PARP inhibitors
CDK12	PARP inhibitors
CHEK1	PARP inhibitors
CHEK2	PARP inhibitors
EGFR	EGFR inhibitors
ERBB2 (HER2)	ERBB2 inhibitors
ESR1	ESR1 inhibitors
FANCA	PARP inhibitors
FANCL	PARP inhibitors
FGFR1	FGFR inhibitors
FGFR2	FGFR inhibitors
FGFR3	FGFR inhibitors
FLT3	FLT3 inhibitors
IDH1	IDH1 inhibitors
IDH2	IDH2 inhibitors
KIT	KIT inhibitors
KRAS	KRAS G12C inhibitors
MAP2K1 (MEK1)	MEK inhibitors
MET	MET inhibitors
MRE11	PARP inhibitors
MTOR	MTOR inhibitors
NBN	PARP inhibitors
NF1	MEK inhibitors
NTRK1	NTRK inhibitors
NTRK2	NTRK inhibitors
NTRK3	NTRK inhibitors
PALB2	PARP inhibitors
PDGFB	PDGFB inhibitors
PDGFRA	PDGFRA inhibitors
PDGFRB	PDGFRB inhibitors
PIK3CA	PIK3CA inhibitors
PTEN	AKT inhibitors
RAD51B	PARP inhibitors
RAD51C	PARP inhibitors
RAD51D	PARP inhibitors
RAD54L	PARP inhibitors
RARA	All-trans retinoic acid
RET	RET inhibitors
ROS1	ROS1 inhibitors
SMARCB1	EZH2 inhibitors
TSC1	MTOR inhibitors
TSC2	MTOR inhibitors
VHL	HIF-2a inhibitors
